# Effects of Neonicotinoid Seed Treatments on Soil Microbial Gene Expression Vary with Time in an Agricultural Ecosystem

Mona Parizadeh,<sup>a,b</sup> Benjamin Mimee,<sup>a,\*</sup> Steven W. Kembel<sup>b,\*</sup>

Agriculture and Agri-Food Canada, Saint-Jean-sur-Richelieu, QC, Canada<sup>a</sup>; Département des sciences biologiques, Université du Québec à Montréal, Montréal, QC, Canada<sup>b</sup>

MP, BM, and SK conceived and designed the study; BM and SK obtained the funding; MP collected and analyzed data and wrote the manuscript; All authors critically reviewed and edited the manuscript.

**ABSTRACT** Neonicotinoids, a class of systemic insecticides, have been widely used for decades against various insect pests. Past studies have reported non-target effects of neonicotinoids on some beneficial macro- and micro-organisms. Given the crucial role that the soil microbiota plays in sustaining soil fertility, it is critical to understand how microbial taxonomic composition and gene expression respond to neonicotinoid exposure. To date, few studies have focused on this question, and these studies have evaluated the shifts in soil microbial taxonomic composition or used soil biochemical analyses to assess the changes in microbial functions. In this study, we have applied a metatranscriptomic approach to quantify the variability in soil microbial gene expression in a two-year soybean/corn crop rotation in Quebec, Canada. We identified weak and temporally inconsistent effects of neonicotinoid application on soil microbial gene expression, as well as a strong temporal variation in soil microbial gene expression among months and years. Neonicotinoid seed treatment altered the expression of a small number of microbial genes, including genes associated with heat shock proteins, regulatory functions, metabolic processes and DNA repair. These changes in gene expression varied during the growing season and between years. Overall, the composition of soil microbial expressed genes seems to be more resilient and less affected by neonicotinoid application than soil microbial taxonomic composition. Our study is among the first to document the effects of neonicotinoid seed treatment on microbial gene expression and highlights the strong temporal variability of soil microbial gene expression and its responses to neonicotinoid seed treatments.

**IMPORTANCE** This work provides the first example of the impacts of neonicotinoid seed treatment on community-wide soil microbial gene expression in an experimental design representing real farming conditions. Neonicotinoid pesticides have attracted a great deal of attention in recent years due to their potential non-target impacts on ecological communities and their functions. Our paper represents the first use of metatranscriptomic sequencing to offer real-time and in-depth insights into the non-target effects of this pesticide on soil microbial gene expression and on potentially beneficial soil microorganisms.

**KEYWORDS:** metatranscriptomics, microbial functional categories, microbial composition and diversity, microbial gene expression, neonicotinoid seed treatment, temporal variability.

Compiled January 19, 2022

This is a draft manuscript, pre-submission

Address correspondence to Benjamin Mimee, [benjamin.mimee@canada.ca](mailto:benjamin.mimee@canada.ca), and Steven W. Kembel, [kembel.steven\\_w@uqam.ca](mailto:kembel.steven_w@uqam.ca).

## 41 INTRODUCTION

42 Soil quality is frequently used as an indicator of environmental health in sustainable  
43 agriculture (1). It refers to the capacity of soil to function in order to sustain biological  
44 productivity and maintain or improve environmental quality and the health of humans,  
45 plants, animals, and other living organisms (2). Soil microbial diversity, composition  
46 and functions are important indicators to monitor and evaluate soil quality (3, 1).  
47 Ecological disturbances caused by environmental stress and perturbations such as  
48 pesticide application have been shown to influence microbial community structure  
49 and functional diversity (4, 5). To better understand the effects of these disturbances  
50 on soil microbiome, it is crucial to study microbial functional activities and gene  
51 expression (6). Past studies have reported effects of some pesticides on soil microbial  
52 functional activities such as microbial biomass enzyme activities and biochemical reactions,  
53 including carbon or nitrogen mineralization, nitrogen fixation, nitrification, and  
54 denitrification (7, 5). However, to date, a systematic evaluation of the effects of pesticide  
55 application on community-wide soil microbial gene expression is lacking. Here  
56 we address this lack of knowledge by measuring the effects of neonicotinoid application  
57 and temporal variation on soil microbial gene expression in a soybean-corn  
58 agroecosystem in Quebec.

59 Neonicotinoids are a widely used family of systemic neuro-active insecticides that  
60 are chemically similar to nicotine. They were introduced to the world in the late 1980s  
61 (8, 9) and today, they are used prophylactically in the form of seed treatments against  
62 a variety of insect pests (10, 11, 12). Past studies have shown the non-target effects  
63 of these pesticides on beneficial insect pollinators such as honeybees and butterflies,  
64 and soil invertebrates such as earthworms (13, 14, 15, 16, 17, 18). Neonicotinoids  
65 are supposed to be selectively more toxic to invertebrates because of the fundamental  
66 distinctions between their nicotinic acetylcholine receptors (nAChRs) compared to  
67 vertebrates (9). However, non-target impacts of these pesticides on the taxonomic  
68 composition of soil microbial communities have been documented, including shifts  
69 in the abundance of diverse taxa, such as a decrease in bacteria genera involved in  
70 nitrification and an increase in bacteria genera related to neonicotinoid biodegradation  
71 (19, 20, 21, 22, 23, 24, 25). An increase in the abundance of the genes coding for  
72 the cytochrome P450 enzyme family has been reported in response to neonicotinoid  
73 exposure, based on soil microbial amplicon and metagenomic sequencing (26, 27).  
74 Previous studies have indicated that this family of detoxifying enzymes is also over-  
75 expressed in the insects resistant to this pesticide and is involved in neonicotinoid  
76 biodegradation (28, 29, 30). Another study has reported that nitrogen-fixing and  
77 nitrifying bacteria are very sensitive to neonicotinoids (31). Studies on the effects of  
78 neonicotinoids on gene expression in different plant species have shown a variety of  
79 responses, including a decrease in the expression of cell wall synthesis-related genes,  
80 which may lead to a lower resistance to cell-content feeder insects, and an increase in  
81 the expression of (1) photosynthesis-related genes, which may prolong the energy  
82 production period, (2) pathogenesis-related genes, and (3) stress tolerance-related genes  
83 (for example genes involved in tolerance to drought and cold) (32, 33, 34, 35). However,  
84 these changes are not consistent and their mechanisms are unknown (36, 37).

85 To our knowledge, none of these past studies have quantified community-wide  
86 changes in soil microbial gene expression in response to neonicotinoid seed treatment;  
87 rather, they have focused on the expression of one or a few genes at a time.  
88 Similarly, biochemical studies have shown that neonicotinoids can have non-target  
89 impacts on soil microbial functional activities and biochemical processes, such as a  
90 decline in soil respiration, nitrification and the activity of nitrite and nitrate reductase

91 enzyme, as well as an inhibition in metabolic processes resulting in a decrease in enzymatic activity (38, 39, 31, 40). But, these studies have focused on one or a few indicators of microbial function. Thus, while there is evidence for changes in individual measures of microbial functional activities, we are not aware of studies that have used transcriptomic or metatranscriptomic approaches to quantify community-wide changes in soil microbial gene expression in response to neonicotinoid seed treatment.

97 In this study, we used metatranscriptomics to evaluate the effects of neonicotinoid seed treatment on soil microbial gene expression. Metatranscriptomics (also known as RNA-seq) identifies the genes that are actually being expressed in a given environment and can help to better study the active functions and the adaptations of microbial communities to environmental changes and stress (41, 42, 43). In this study, our specific objectives were to (1) characterize soil microbial gene expression, including bacterial and eukaryotic expressed genes, in a two-year soybean/corn crop rotation using metatranscriptomic sequencing, and (2) assess the effects of neonicotinoid seed treatment on soil microbial gene expression in this agroecosystem. We hypothesized that (1) neonicotinoid seed treatment and time affect soil microbial gene expression and (2) the expression of pesticide degradation-related genes increases, while the expression of nitrification-related genes decreases in response to neonicotinoid seed treatment. To address our objectives and hypotheses, we studied soil microbial gene expression using a metatranscriptomic approach in a two-year soybean/corn crop rotation in Quebec, Canada.

## 112 RESULTS

### 113 Soil microbial profiling based on SEED hierarchical microbial functional and RefSeq bacterial and eukaryotic functional categories

114 We detected an average (mean  $\pm$  SE) of  $4,878 \pm 4$  SEED hierarchical functional categories (level 4) per sample,  $22,902 \pm 162$  RefSeq bacterial functional categories per sample, and  $9,899 \pm 206$  RefSeq eukaryotic functional categories per sample. The SEED-based hierarchical annotation results indicated that 50.5% of the total relative abundance of microbial expressed genes at level 1 of the SEED hierarchy belonged to the ten most abundant microbial functional categories at this level (Table 1A). The majority of the most abundant level 4 SEED hierarchy functional categories were similar to the ten most abundant bacterial and eukaryotic RefSeq-based functional categories, including genes related to chaperone GroEL, chaperone DnaK, DNA-directed RNA polymerase beta subunit, elongation factor G and elongation factor T (Table 1B and Fig. S1). The ten most abundant functional categories accounted for 21.7%, 10.0% and 18.1% of the total relative abundance of, respectively, SEED hierarchical microbial (level 4), RefSeq bacterial and eukaryotic expressed genes (Table 1B and Fig. S1).

### 128 Effects of neonicotinoid seed treatment on the composition and diversity of soil microbial expressed genes

129 Neonicotinoid seed treatment had no significant effect on the overall composition and diversity of soil microbial expressed genes (based on PERMANOVA and Wilcoxon rank-sum test on Shannon index). However, time (year and month) was an important driver of variation in the composition and diversity of soil microbial expressed genes. Year and month together explained significant variation in gene expression at level 4 of SEED hierarchical functional categories (25.07%), RefSeq bacterial functional categories (21.33%), and RefSeq eukaryotic functional categories (10.90%) (PERMANOVA  $P < 0.001$ , Table 2 and Fig. 1).

138 Additionally, while the alpha diversity of microbial functional categories of expressed genes was not affected by year, it was significantly higher in June than September in

Parizadeh et al.

**TABLE 1** Ten most abundant soil SEED hierarchical functional categories (levels 1-3: A and level 4: B), RefSeq bacterial and eukaryotic functional categories (B) in a two-year soybean/corn crop rotation in L'Acadie, Quebec, Canada.

**A)**

| Functional Databases                       | Functional Categories                             | Relative Abundance (%) |
|--------------------------------------------|---------------------------------------------------|------------------------|
| <b>SEED Hierarchical Profile (Level 1)</b> | Protein biosynthesis                              | 13.20                  |
|                                            | No hierarchy / NA                                 | 9.67                   |
|                                            | Transcription                                     | 5.44                   |
|                                            | Protein folding                                   | 5.29                   |
|                                            | Clustering-based subsystems                       | 4.46                   |
|                                            | Central carbohydrate metabolism                   | 3.56                   |
|                                            | Protein degradation                               | 2.50                   |
|                                            | Resistance to antibiotics and toxic compounds     | 2.38                   |
|                                            | Lysine, threonine, methionine, and cysteine       | 2.04                   |
|                                            | Heat shock                                        | 1.93                   |
| <b>SEED Hierarchical Profile (Level 2)</b> | No hierarchy / NA                                 | 25.30                  |
|                                            | Protein Metabolism                                | 21.60                  |
|                                            | Carbohydrates                                     | 9.38                   |
|                                            | Amino Acids and Derivatives                       | 6.77                   |
|                                            | RNA Metabolism                                    | 6.74                   |
|                                            | Stress Response                                   | 5.33                   |
|                                            | Respiration                                       | 3.83                   |
|                                            | Cofactors, Vitamins, Prosthetic Groups, Pigments  | 3.25                   |
|                                            | Virulence, Disease and Defense                    | 2.54                   |
| Clustering-based subsystems                | 2.15                                              |                        |
| <b>SEED Hierarchical Profile (Level 3)</b> | No hierarchy / NA                                 | 9.57                   |
|                                            | Ribosome LSU bacterial                            | 4.60                   |
|                                            | GroEL GroES                                       | 4.42                   |
|                                            | Ribosome SSU bacterial                            | 3.60                   |
|                                            | RNA polymerase bacterial                          | 3.02                   |
|                                            | Translation elongation factors bacterial          | 1.98                   |
|                                            | Heat shock dnaK gene cluster extended             | 1.93                   |
|                                            | Proteolysis in bacteria, ATP-dependent            | 1.90                   |
|                                            | Transcription initiation, bacterial sigma factors | 1.63                   |
|                                            | Ton and Tol transport systems                     | 1.42                   |

**B)**

| SEED Hierarchy (Level 4)                              | Relative Abundance (%) | RefSeq Bacteria                           | Relative Abundance (%) | RefSeq Eukaryotes                                          | Relative Abundance (%) |
|-------------------------------------------------------|------------------------|-------------------------------------------|------------------------|------------------------------------------------------------|------------------------|
| No hierarchy / NA                                     | 9.57                   | Molecular chaperone GroEL                 | 2.59                   | Heat shock protein 60, mitochondrial precursor             | 4.33                   |
| Heat shock protein 60 family chaperone GroEL          | 3.80                   | DNA-directed RNA polymerase subunit beta  | 2.00                   | Heat shock protein 78, mitochondrial precursor             | 2.12                   |
| DNA-directed RNA polymerase beta subunit (EC 2.7.7.6) | 2.57                   | Molecular chaperone DnaK                  | 0.96                   | Putative chaperonin GroL                                   | 1.73                   |
| Chaperone protein DnaK                                | 1.21                   | ABC transporter ATP-binding protein       | 0.91                   | Cold-shock DNA-binding domain-containing protein           | 1.66                   |
| Translation elongation factor Tu                      | 0.87                   | MFS transporter                           | 0.65                   | Chaperonin homolog Hsp-60, mitochondrial                   | 1.53                   |
| RNA polymerase sigma factor RpoD                      | 0.80                   | Elongation factor G                       | 0.64                   | Elongation factor Tu, mitochondrial precursor              | 1.53                   |
| Translation elongation factor G                       | 0.76                   | Endopeptidase La                          | 0.60                   | Chaperonin Hsp-60                                          | 1.45                   |
| ATP-dependent protease La (EC 3.4.21.53) Type I       | 0.75                   | ABC transporter substrate-binding protein | 0.57                   | Heat shock 60kD protein 1                                  | 1.40                   |
| SSU ribosomal protein S1p                             | 0.71                   | DNA-binding response regulator            | 0.56                   | Chaperone protein DnaK                                     | 1.30                   |
| Cell division protein FtsH (EC 3.4.24.-)              | 0.65                   | Elongation factor Tu                      | 0.54                   | Chaperonin homolog HSP60, mitochondrial precursor, partial | 1.00                   |

Neonicotinoids Affect Soil Microbial Gene Expression

SEED hierarchical functional categories (Shannon index mean  $\pm$  SE  $6.57 \pm 0.02$  versus  $6.46 \pm 0.01$ , Wilcoxon  $P$ -value  $< 0.0001$ ), RefSeq bacterial functional categories (Shannon index mean  $\pm$  SE  $7.70 \pm 0.02$  versus  $7.58 \pm 0.01$ , Wilcoxon  $P$ -value  $< 0.0001$ ) and RefSeq eukaryotic functional categories (Shannon index mean  $\pm$  SE  $7.14 \pm 0.06$  versus  $6.87 \pm 0.06$ , Wilcoxon  $P$ -value  $< 0.001$ ).

**TABLE 2** Drivers of the soil microbial gene expression variation in response to neonicotinoid seed treatment, time and their interactions in a two-year soybean/corn rotation in l'Acadie, Quebec, Canada (PERMANOVA based on Bray-Curtis dissimilarities).

| Variables                                 | SEED Hierarchical Gene Expression |       |          | RefSeq Bacterial Gene Expression |       |          | RefSeq Eukaryotic Gene Expression |      |          |
|-------------------------------------------|-----------------------------------|-------|----------|----------------------------------|-------|----------|-----------------------------------|------|----------|
|                                           | R <sup>2</sup> (%)                | F     | Pr(>F)   | R <sup>2</sup> (%)               | F     | Pr(>F)   | R <sup>2</sup> (%)                | F    | Pr(>F)   |
| Year/Month                                | 25.07                             | 14.64 | 0.001*** | 21.33                            | 10.86 | 0.001*** | 10.90                             | 4.65 | 0.001*** |
| Neonicotinoid seed treatment              | 1.91                              | 1.11  | NS       | 2.13                             | 1.08  | NS       | 1.87                              | 0.80 | NS       |
| Year/Month : Neonicotinoid seed treatment | NS                                | NS    | NS       | NS                               | NS    | NS       | NS                                | NS   | NS       |

<sup>a</sup>(:) represents the interaction between variables and (/) represents the nested interaction between variables.

<sup>b</sup>Significance levels for each variable are given by: \*\*\*  $P < 0.001$ ; \*\*  $P < 0.01$ ; \*  $P < 0.05$ ; NS,  $P \geq 0.05$ .

**Effects of neonicotinoid seed treatment on differential gene expression in soil microbiome**

Analysis of differential expression of genes identified no significant effect of neonicotinoid seed treatment on gene expression of all samples from both sampling times and both years of rotation together (DESeq2 adjusted  $P < 0.05$ ). However, looking individually at each year of rotation, neonicotinoid seed treatment led to significantly increased expression of two SEED hierarchical functional categories (level 4: phycobilisome core-membrane linker polypeptide and excinuclease ABC subunit A paralog in greater Bacteroides group) in 2016, when the field was planted with soybean, and decreased expression of one SEED hierarchical functional category (level 4: inner membrane protein CreD) in 2017, in the corn field (DESeq2 adjusted  $P < 0.05$ , Table 3). In 2016, the expression of some RefSeq bacterial functional categories also significantly decreased (chaperone protein ClpB and heat-shock protein IbpA) or increased (prochlorophyllide oxidoreductase) in neonicotinoid-treated samples (DESeq2 adjusted  $P < 0.05$ , Table 3). Finally, for each sampling time, the expression of genes from a few RefSeq bacterial functional categories decreased in June (phosphonate C-P lyase system protein PhnG and beta-aspartyl-peptidase) and in September (chaperone protein ClpB) in response to neonicotinoid seed treatment (DESeq2 adjusted  $P < 0.05$ , Table 3).

While there were relatively few changes in gene expression as a result of neonicotinoid seed treatment, the expression of many soil microbial genes was impacted by time (DESeq2 adjusted  $P < 0.05$ ). Among the SEED hierarchical functional categories (level 4), the expression of 910 genes significantly increased and 903 genes significantly decreased in 2017 versus 2016, and the expression of 516 versus 540 genes significantly increased and decreased in September versus June (DESeq2 adjusted  $P < 0.05$ , Tables S1A and S1B). For example, a gene that encodes the glutathione-regulated potassium-efflux system ancillary protein KefG was significantly overexpressed in 2016 compared to 2017, as well as in September compared to June (DESeq2 adjusted  $P < 0.05$ , Tables S1A and S1B). Among the RefSeq bacterial functional categories, the expression of 2,250 and 2,561 genes significantly increased and decreased in 2017 versus 2016, and the expression of 1,256 versus 1,860 genes significantly increased and

Parizadeh et al.

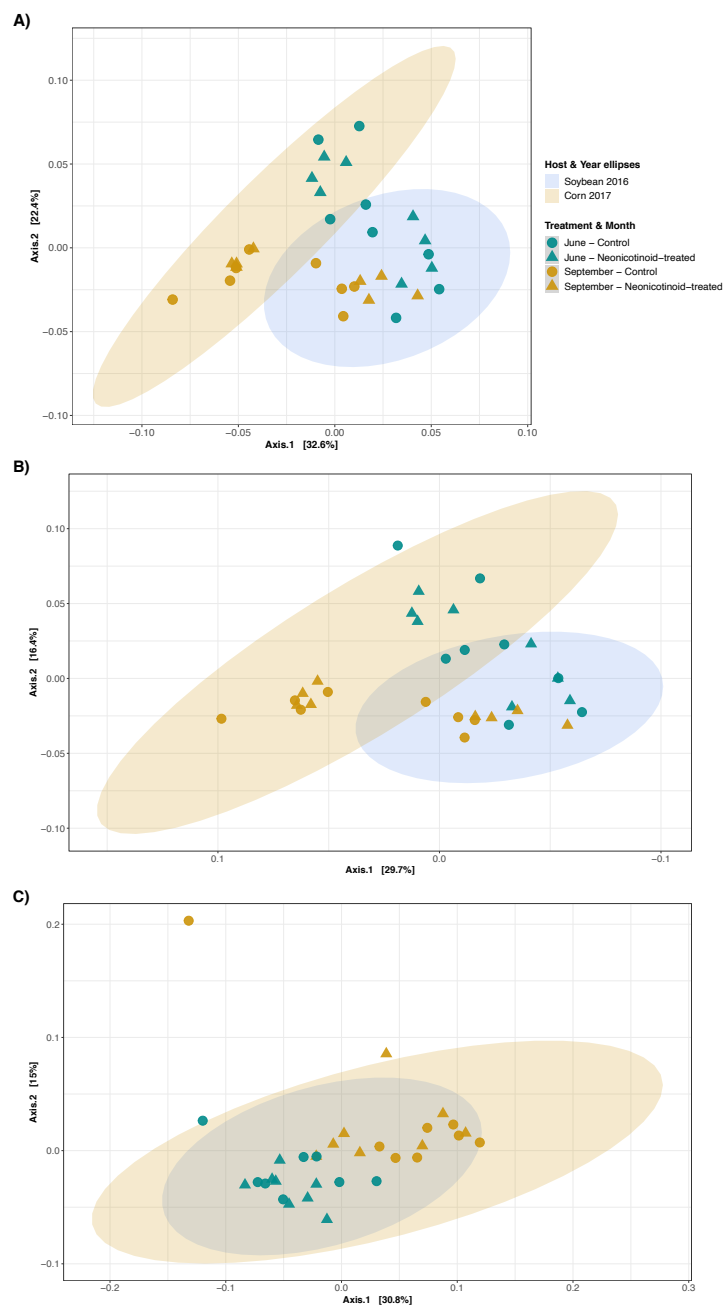

**FIG 1** Composition variation of soil microbial expressed genes in response to neonicotinoid seed treatment and time. Principal coordinate analysis (PCoA) on Bray-Curtis dissimilarities illustrates the composition variation of soil SEED hierarchical microbial (level 4; A), RefSeq bacterial (B) and RefSeq eukaryotic (C) expressed genes between control ( $n = 16$ ) and neonicotinoid-treated ( $n = 16$ ) samples in a two-year soybean (2016) and corn (2017) rotation in L'Acadie, Quebec, Canada. Microbial gene expression varies among months (June: green points and September: yellow points) in control (circle) and neonicotinoid-treated (triangle) samples. Ellipses are shaded based on host species and year of cultivation (blue for 2016 soybean samples and yellow for 2017 corn samples) and represent a 99% confidence level.



Neonicotinoids Affect Soil Microbial Gene Expression

176 decreased in September versus June (DESeq2 adjusted  $P < 0.05$ , Tables S1C and S1D).  
 177 For example, genes that encode avidin, hydroxyacid oxidoreductase and nitrogenase  
 178 molybdenum-iron protein alpha chain were overexpressed in September compared  
 179 to June, and also in 2016 compared to 2017 while the expression of a gene coding  
 180 for pesticidal proteins significantly increased in 2017 versus 2016 (DESeq2 adjusted  
 181  $P < 0.05$ , Tables S1C and S1D). Finally, among the RefSeq eukaryotic functional cate-  
 182 gories, the expression of 554 and 614 genes significantly increased and decreased in  
 183 2017 versus 2016, and the expression of 322 versus 339 genes significantly increased  
 184 and decreased in September versus June (DESeq2 adjusted  $P < 0.05$ , Tables S1E and  
 185 S1F). For instance, a gene that encodes Kunitz trypsin inhibitor precursor was overex-  
 186 pressed in September compared to June and in 2016 compared to 2017. In addition,  
 187 the expression of a gene that encodes alpha-amylase inhibitor/lipid transfer/seed stor-  
 188 age family protein precursor increased in June versus September, and the expression  
 189 of another gene encoding nematode resistance protein-like HSPRO2 increased in 2016  
 190 versus 2017 (DESeq2 adjusted  $P < 0.05$ , Tables S1E and S1F). Finally, based on all three  
 191 microbial annotated datasets, the expression of several heat shock protein-related  
 192 genes (such as heat shock protein 60, protein IbpA, chaperone protein ClpB, chaper-  
 193 one GroEL and chaperone GroES) increased in September, whereas the expression  
 194 of the cold shock protein-related genes (such as cold shock proteins CapB, CspA and  
 195 CspD) increased in June (DESeq2 adjusted  $P < 0.05$ , Tables S1B, S1D and S1F).

**TABLE 3** Soil SEED hierarchical microbial (level 4), RefSeq bacterial and eukaryotic ex-  
 pressed genes associated with control and neonicotinoid seed treatment at different  
 times. Soil microbial genes that are significantly differentially expressed (adjusted  $P <$   
 $0.05$ ) among different times and between control and neonicotinoid-treated samples  
 in a two-year soybean/corn rotation in L'Acadie, Quebec, Canada identified by Differ-  
 ential expression analysis of sequence data (DESeq2).

| Condition                 | Variable              | Gene Expression                                                                                     |                                  |                                              |                                  |                      |                                  |
|---------------------------|-----------------------|-----------------------------------------------------------------------------------------------------|----------------------------------|----------------------------------------------|----------------------------------|----------------------|----------------------------------|
|                           |                       | SEED Hierarchy<br>(Level 4   Level 1)                                                               | log <sub>2</sub> -fold<br>Change | RefSeq<br>Bacteria                           | log <sub>2</sub> -fold<br>Change | RefSeq<br>Eukaryotes | log <sub>2</sub> -fold<br>Change |
| Treatment                 | Control               | -                                                                                                   | -                                | -                                            | -                                | -                    | -                                |
|                           | Neonicotinoid-treated | -                                                                                                   | -                                | -                                            | -                                | -                    | -                                |
| Treatment<br>in June      | Control               | -                                                                                                   | -                                | Phosphonate C-P lyase<br>system protein PhnG | -17.04                           | -                    | -                                |
|                           | Neonicotinoid-treated | -                                                                                                   | -                                | Beta-aspartyl-peptidase                      | -3.41                            | -                    | -                                |
| Treatment<br>in September | Control               | -                                                                                                   | -                                | Chaperone protein ClpB                       | -2.34                            | -                    | -                                |
|                           | Neonicotinoid-treated | -                                                                                                   | -                                | -                                            | -                                | -                    | -                                |
| Treatment<br>in 2016      | Control               | -                                                                                                   | -                                | Chaperone protein ClpB                       | -2.62                            | -                    | -                                |
|                           | Neonicotinoid-treated | Phycobilisome core-membrane<br>linker polypeptide   Light-<br>harvesting complexes                  | 3.60                             | Protochlorophyllide<br>oxidoreductase        | 2.05                             | -                    | -                                |
| Treatment<br>in 2017      | Control               | Excinuclease ABC<br>subunit A paralog in<br>greater Bacteroides group  <br>DNA repair               | 0.61                             | -                                            | -                                | -                    | -                                |
|                           | Neonicotinoid-treated | Inner membrane<br>protein CreD  <br>Bacteriocins, ribosomally<br>synthesized antibacterial peptides | -0.85                            | -                                            | -                                | -                    | -                                |

196 **DISCUSSION**

197 Neonicotinoid seed treatment had weak and temporally variable effects on soil mi-  
 198 crobrial gene expression in a soybean-corn agroecosystem. Conversely, time was a  
 199 strong driver of the composition and diversity of soil microbial expressed genes, as  
 200 expected and similar to its important effects on soil microbial taxonomic composition  
 201 and diversity (44, 25). Time had a very strong effect on the expression of numerous  
 202 soil microbial genes. Among them, several genes associated with cold shock protein  
 203 were overexpressed in June, whereas many genes related to heat shock protein were

Parizadeh et al.

204 overexpressed in September, suggesting that temporal variation in gene expression is  
205 related to changes in environmental conditions and in particular to temperature. A few  
206 previous studies have also shown the temporal changes of soil microbial functional ac-  
207 tivities and biochemical processes in response to different agrochemical treatments,  
208 including fertilizer or pesticide application (45, 46). Our results thus suggest that while  
209 gene expression in soil microbial communities is highly variable in time, these commu-  
210 nities are either highly resistant or resilient to changes in gene expression in response  
211 to neonicotinoid seed treatment. This can be due to functional redundancy in the iden-  
212 tity of expressed genes, despite the major variation in the taxonomic composition of  
213 these microbial communities that we have previously observed (25). Past studies have  
214 suggested that various co-occurred microbial communities may be functionally redun-  
215 dant. Therefore, changes in microbial taxonomic composition and diversity, especially  
216 when the community is diverse, do not necessarily affect ecosystem function (47, 48).  
217 There is thus an open question whether gene expression in soil microbial communi-  
218 ties exhibits the pattern of functional redundancy as documented in other ecosystems  
219 (49, 50, 51, 52, 53, 54).

220 Our findings indicate that the expression of some genes related to heat shock pro-  
221 tein, metabolic processes (i.e., phosphonate break down and enzyme catalysis), and  
222 regulatory functions (i.e., respiration) decreased, while the expression of several genes  
223 related to DNA repair increased, at different time-spans in the neonicotinoid-treated  
224 samples compared to control samples. This suggests a temporally variable interaction  
225 between neonicotinoids and environmental stressors. We detected a decline in the ex-  
226 pression of the genes related to metabolic processes, such as phosphonate C-P lyase  
227 system protein PhnG related, a gene implicated in phosphonate break down, and beta-  
228 aspartyl-peptidase, which is an enzyme catalyzer, in the neonicotinoid-treated sam-  
229 ples. This is in accordance with previous biochemical studies showing changes in soil  
230 microbial metabolic processes in response to neonicotinoid application (38, 39, 31, 40).  
231 The observed decrease in the expression of genes such as CreD, which plays a crucial  
232 role in regulatory functions including respiration (55, 56), in the samples exposed to  
233 neonicotinoid treatment at some time points also agrees with the findings of past  
234 biochemical studies showing negative effects of neonicotinoids on soil bacterial respi-  
235 ration (31, 57, 24). Finally, an increase in the expression of genes related to DNA repair  
236 (genes encoding excinuclease ABC (subunit A)) in response to neonicotinoid seed treat-  
237 ment at some time points suggests that neonicotinoids may induce DNA damage in  
238 microbial cells.

239 Overall, despite our hypothesis that the expression of pesticide degradation-related  
240 genes would increase and the expression of nitrification-related genes decrease in re-  
241 sponse to neonicotinoid seed treatment, and previous observations of soil microbial  
242 taxonomic and physiochemical changes due to neonicotinoid application (58, 31, 40,  
243 22, 25), we did not detect any significant shifts in the expression of genes related to  
244 biodegradation of neonicotinoids or any decline in the expression of the genes as-  
245 sociated with nitrification. We suggest several possible explanations for this finding:  
246 First, as mentioned previously, strong temporal changes in the expression of soil mi-  
247 crobial genes may have masked subtle effects of neonicotinoid seed treatments on  
248 gene expression. Secondly, changes in gene expression in response to neonicotinoid  
249 seed treatment may have been short-lived, and thus the gradual changes in microbial  
250 gene expression are not captured by our sampling interval. However, this seems un-  
251 likely since we sampled both early and late in the growing season. Finally, it is possible  
252 that soil microbial communities are functionally resistant or resilient, leading to few  
253 changes in gene expression in response to neonicotinoid seed treatment. Compared



254 to measures of soil microbial community taxonomic structure (25), soil microbial gene  
255 expression seems to be less sensitive to the stress imposed by neonicotinoid applica-  
256 tion. This is probably due to the functional resilience and redundancy of microbial  
257 communities (59), and it is in line with the findings of previous studies showing less  
258 variability in microbial gene expression than taxonomic composition (49, 50, 52, 60, 54).  
259 Further validation of these findings using metabolomic analysis to quantify microbial  
260 metabolites and determine changes in microbiome metabolism in response to neon-  
261 icotinoid seed treatment may help us improve our understanding of soil microbial  
262 functional dynamics and make our findings more reproducible and applicable.

263 Our findings are based on only two years of soybean/corn crop rotation, which  
264 makes it impossible for us to distinguish the effects of host species versus time. We  
265 did not measure environmental changes during the growing season, neither did we  
266 quantify the homogeneity of neonicotinoid concentrations across the treated samples.  
267 The changes in neonicotinoid concentration in soil over time and among samples due  
268 to their consumption and biodegradation of neonicotinoids, the potential for an in-  
269 crease in the residuals of neonicotinoid and degradation products towards the end of  
270 the season and the accumulation of these products in soil over the years of rotation,  
271 and finally the changes in temperature, humidity and other environmental factors dur-  
272 ing the experience may also partially explain the effects of time on the microbial gene  
273 expression variation, and future studies will be required to distinguish among the im-  
274 pacts of these factors. Thus, overall we can only conclude that some combination of  
275 host species and time had important impacts on microbial communities.

276 The present results are based on microbial annotations against the SEED Subsys-  
277 tems hierarchical database and the NCBI's RefSeq bacterial genomes and eukaryotic  
278 genomes databases. These databases are popular and reliable; however, due to a lack  
279 of standard labeling of genes, a future challenge will be to improve microbial genome  
280 databases, in particular for diverse ecosystems such as soils for which there are rela-  
281 tively few reference genomes and databases available and for which many gene func-  
282 tions remain unknown. Technological advancements such as long-read sequencing  
283 and an assembly-based approach to transcriptomics should also advance our under-  
284 standing of the gene expression in large microbial eukaryotic genomes.

## 285 CONCLUSIONS

286 In this study, we used metatranscriptomics of soil microbial communities to demon-  
287 strate high temporal variability but relatively weak and temporally variable effects of  
288 neonicotinoid seed treatment on soil microbial gene expression in a soybean-corn  
289 agroecosystem. In different time-spans, genes related to heat shock protein, regula-  
290 tory functions (such as soil respiration) and metabolic processes (such as phosphonate  
291 breakdown and enzyme catalysis) were underexpressed in response to neonicotinoid  
292 seed treatment, whereas genes related to photosynthesis and DNA repair were over-  
293 expressed in response to neonicotinoid seed treatment. Our results demonstrate the  
294 crucial role of time and temporal changes in shaping soil microbial gene expression.  
295 To our knowledge, our study provides the first example of the impacts of neonicotinoid  
296 seed treatment on community-wide soil microbial gene expression in an experimen-  
297 tal design representing real farming conditions. Overall, metatranscriptomic studies  
298 offer real-time and in-depth insight into the biologically active microbiomes and how  
299 microbial gene expression responds to neonicotinoid seed treatment.

## 300 **MATERIALS AND METHODS**

### 301 **Study Site**

302 The study was conducted in an experimental farm in Agriculture and Agri-Food Canada,  
303 located in L'Acadie (45°17'38.0"N; 73°C20'58.0"W), Quebec, Canada. L'Acadie is in the  
304 Canadian hardiness zone 5a and has a temperate climate and clay loam soil. In a  
305 two-year crop rotation system, we planted soybean (2016) and corn (2017) in mid-  
306 May, in 100 x 3 m plots with four replicates of non-neonicotinoid-treated (control) and  
307 neonicotinoid-treated seeds. There were four rows in each plot and the field was sur-  
308 rounded by two extra neonicotinoid-treated plots. All seeds were coated by three  
309 fungicides (difenoconazole, metalaxyl-M and sedaxane), in addition to 0.25 mg/seed  
310 thiamethoxam for the neonicotinoid-treated seeds. For three years before the exper-  
311 iment, the field had not been treated by any type of neonicotinoids and was a no-till  
312 meadow. We used glyphosate before and one month after seeding to control weeds,  
313 and in the corn field we also used 400 kg/ha NPK fertilizer (15-15-15) before seeding  
314 and 222 kg/ha N fertilizer (27.5%) one month after seeding. There were no significant  
315 differences in soil physicochemical properties (e.g., pH, etc.) across the field, nor be-  
316 tween months or years (see more details in our previous study (25)).

### 317 **Soil Sample Collection**

318 Each year, we retrieved 32 soil samples, two samples per plot at two sampling times  
319 (in June and September), for a total of 64 samples. For each sample, we used a sterile  
320 2-cm diameter corer to collect soil from the upper 12-15 cm layer of the bulk soil (soil  
321 that does not adhere to plant roots) from six different spots at 10 cm around 6-10  
322 close plants in a zigzag pattern and pooled them into one 400-500 g sample. Samples  
323 were immediately transferred to the laboratory in a cooler and kept at -80°C for RNA  
324 extraction.

### 325 **RNA extraction**

326 We extracted RNA using the MoBio/QIAGEN RNeasy PowerSoil Total RNA Kit from 2  
327 g of each soil sample according to the manufacturer's instructions. To better capture  
328 the soil microbial functional variation, we extracted RNA twice from each sample and  
329 pooled them into one. We also pooled the extracted RNA of the two samples collected  
330 from the same plot (each replicate). Before and after pooling, total extracted RNA was  
331 quantified using a NanoDrop Spectrophotometer ND-1000 (NanoDrop Technologies,  
332 Inc.), and its integrity was assessed using RNA 6000 Nano LabChip Kit in microcapillary  
333 electrophoresis (Agilent 2100 Bioanalyzer, Agilent Technologies). Samples were then  
334 stored at -80°C until sequencing.

### 335 **Library preparation and metatranscriptomic sequencing**

336 RNA samples with an RNA integrity number (RIN)  $\geq 8.0$  were sent to Genome Québec  
337 (Montreal, Quebec, Canada) for metatranscriptomic sequencing. To increase the num-  
338 ber of sequenced mRNAs, ribosomal RNA (rRNA) was depleted from 250 ng of total  
339 RNA using Illumina Ribo-Zero rRNA Removal Kits Bacteria. Residual RNA was cleaned  
340 up using the Agencourt RNAClean™ XP Kit (Beckman Coulter) and eluted in water.  
341 The second round of ribo-depletion was done using Illumina Ribo-Zero rRNA Removal  
342 Kits (Yeast). Residual RNA was again cleaned up using the Agencourt RNAClean™ XP  
343 Kit (Beckman Coulter) and eluted in water. Complementary DNA (cDNA) synthesis was  
344 achieved with the NEBNext RNA First-Strand Synthesis and NEBNext Ultra Directional  
345 RNA Second Strand Synthesis Modules (New England BioLabs). The remaining steps  
346 of library preparation were done using the NEBNext Ultra II DNA Library Prep Kit for Il-  
347 lumina (New England BioLabs). Adapters and PCR primers from New England BioLabs  
348 were employed. Libraries were quantified using the Quant-iT PicoGreen dsDNA Assay  
349 Kit (Life Technologies) and the Kapa Illumina GA with Revised Primers-SYBR Fast Uni-

350 versal kit (Kapa Biosystems). The average fragment size (313 bp, including adapters)  
351 was determined using a LabChip GX instrument (PerkinElmer). RNA samples were fi-  
352 nally paired-end sequenced on four lanes (eight samples per lane) on Illumina HiSeq  
353 at the Genome Québec facility (Montreal, Quebec, Canada).

### 354 **Bioinformatic analyses, quality filtering and rarefaction**

355 We processed the metatranscriptomic data according to the standalone metatran-  
356 scriptome analysis (SAMSA2) pipeline (61). We first merged the paired-end reads to  
357 make contigs using PEAR v0.9.5 (62). Then, we applied Trimmomatic v0.32 (63) (pa-  
358 rameters: PE -phred33, SLIDINGWINDOW:4:15 and MINLEN:99) on the merged meta-  
359 transcriptomes to remove adaptor contamination and low-quality sequences. Physical  
360 depletion of rRNA using the ribo-depletion kits usually eliminates about 80% of ribo-  
361 somal RNA (61). To remove the rest of the rRNA, we performed a bioinformatic ribo-  
362 depletion using SortMeRNA v2.0 (64). For gene annotation, we used DIAMOND aligner  
363 v2.0.4 (65, 66) to BLAST the metatranscriptomes against the SEED Subsystems hierar-  
364 chical database (67) and the NCBI's RefSeq bacterial genomes and eukaryotic genomes  
365 databases (68). We used the python scripts provided by SAMSA2 to (1) group the iden-  
366 tified SEED genes into a four-level hierarchy of subsystems (a set of genes that are  
367 associated with each other and perform a particular biological process together), (2)  
368 aggregate the large results of annotations into summarized tables of microbial genes,  
369 and (3) calculate the metatranscriptome abundance counts for further analyses. In  
370 order to minimize the possible technical artifacts caused by the number of reads, PCR,  
371 library preparation or sequencing, we performed the following steps of data cleaning:  
372 (1) given the lack of standard labeling of genes in databases, we inspected the names  
373 of the 100 most abundant genes in each annotated dataset and gave a unique name to  
374 the same genes that were labeled differently and then combined the duplicate genes,  
375 as follows: (i) in the RefSeq-based annotations of bacteria, we replaced "DNA-directed  
376 RNA polymerase subunit beta'" with "DNA-directed RNA polymerase subunit beta",  
377 (ii) in the RefSeq-based annotations of eukaryotes, we substituted "'Cold-shock' DNA-  
378 binding domain containing protein" by "cold-shock DNA-binding domain-containing  
379 protein", and (iii) in the level 4 of SEED-based hierarchical annotations, we changed  
380 "DNA-directed RNA polymerase beta' subunit (EC 2.7.7.6)" to "DNA-directed RNA poly-  
381 merase beta subunit (EC 2.7.7.6)"; (2) then, we explored samples to verify if there are  
382 any outlier samples with a very different composition of microbial expressed genes  
383 based on Shannon diversity and the non-metric multidimensional scaling (NMDS) on  
384 Bray-Curtis dissimilarities (69); (3) we removed the rare expressed genes with fewer  
385 than five reads in the entire metatranscriptome from the RefSeq-based annotation  
386 results (respectively, 37.5% and 36.0% of the total number of bacterial and eukaryotic  
387 expressed genes); (4) we also filtered all the expressed genes annotated as hypotheti-  
388 cal proteins (1.0% of the remaining SEED-based hierarchical expressed genes, 0.1% of  
389 the remaining RefSeq-based bacterial expressed genes, and 36.7% of the remaining  
390 RefSeq-based eukaryotic expressed genes), and (5) then we rarefied samples based  
391 on their rarefaction curves (Fig. S2) to approximately the lowest number of reads per  
392 sample in SEED-based hierarchical annotations (1,430,000 reads per sample and keep-  
393 ing all the samples and remaining expressed genes) and RefSeq-based annotations  
394 (1,800,000 and 260,000 reads per sample of the RefSeq-based bacterial and eukaryotic  
395 annotated datasets, respectively, which resulted in keeping all the samples and 98.5%  
396 of the remaining expressed genes). Finally, we used R to analyze these datasets.

### 397 **Statistical analyses**

398

### Soil SEED hierarchical microbial and RefSeq bacterial and eukaryotic functional profiling

To profile the microbial functional categories and their hierarchical levels of the soil samples collected from a two-year rotation of soybean and corn, we quantified the richness of functional categories of expressed genes (number of functional categories per sample) in SEED-based hierarchical and RefSeq-based annotated data. We also determined the ten most abundant microbial functional categories at different levels of SEED hierarchy, as well as the ten most abundant RefSeq bacterial and eukaryotic functional categories according to the total relative abundance of the annotated meta-transcriptomes.

### Effects of neonicotinoid seed treatment on the composition and diversity of soil microbial expressed genes

To study the impacts of neonicotinoid seed treatment on microbial gene expression variation, we first examined the relationships between microbial expressed genes and neonicotinoid seed treatment and time (year and month). To achieve this, we performed a permutational multivariate analysis of variance (PERMANOVA) (70) with 999 permutations on each of the annotated datasets separately using the `adonis2` function of the `vegan` package v2.5.7 (71) in R v4.0.3 (72) (model: . ~ year/month \* neonicotinoid seed treatment). We also conducted a principal coordinate analysis (PCoA) ordination based on Bray-Curtis dissimilarities on each annotated dataset to visualize the variation in microbial gene expression across the soil samples in response to neonicotinoid seed treatment. Finally, we evaluated the impacts of neonicotinoid seed treatment and time (year and month) on the alpha diversity of SEED-based hierarchical microbial expressed genes and RefSeq-based microbial expressed genes using the Shannon index. For each dataset, we examined the significance of differences in alpha diversity of expressed genes between control and neonicotinoid-treated samples using the non-parametric Wilcoxon rank-sum test (73).

### Effects of neonicotinoid seed treatment on differential gene expression in soil microbiome

We performed a differential expression analysis of sequence data using DESeq2 (74) individually on each annotated dataset to identify microbial expressed genes that differed in abundance between all the control and neonicotinoid-treated samples, and between the control and neonicotinoid-treated samples from each sampling time during the growing season (June and September) and from each year (2016 and 2017) to study the temporal effects of neonicotinoid seed treatment on microbial gene expression, as well as between each sampling time and year regardless of the treatment to study the temporal changes of microbial gene expression. We conducted these analyses on the non-rarefied and non-normalized quality filtered and denoised data. We used the  $\log_2$ -fold changes in gene expression levels to identify genes that were differentially expressed in control versus neonicotinoid-treated samples, between months, and between years, and the Wald test with a local fit type to test the significance of the gene expression differences. Finally, we adjusted the *P*-values by applying the Benjamini-Hochberg false-discovery rate (FDR) method (75) to correct for multiple testing. We chose a significance cutoff of adjusted *P*-values < 0.05 to identify significantly differentially expressed genes between control and neonicotinoid-treated samples or across time.

### Availability of data and materials.

We have deposited the raw sequences at the NCBI Sequence Read Archive (SRA accession number: PRJNA780648). Our scripts to perform the current study analyses are available in the following GitHub repository: <https://github.com/memoll/metatranscriptomics>.

#### 449 SUPPLEMENTAL MATERIAL

450 **FIG S1. Most abundant microbial functional categories.** Ten most abundant soil  
451 SEED hierarchical microbial functional categories (level 4: A), RefSeq bacterial func-  
452 tional categories (B), and RefSeq eukaryotic functional categories (C) in a two-year soy-  
453 bean/corn crop rotation in L'Acadie, Quebec, Canada. Each stack bar represents one  
454 soil sample. Mutual functional categories among the three gene profiles are repre-  
455 sented with the same colors.

456 **FIG S2. Rarefaction curves of the soil microbial gene expression.** Rarefaction  
457 curves for SEED hierarchical microbial (level 4; A), RefSeq bacterial (B), and RefSeq eu-  
458 karyotic (C) gene expression according to the observed number of expressed genes  
459 in soil samples of a two-year soybean/corn rotation in l'Acadie, Quebec, Canada. Each  
460 line and color represent one soil sample. The maximum sequencing coverage (x-axis:  
461 number of expressed genes) is 5,000,000 reads with cutoffs at 10,000, 50,000, 100,000,  
462 500,000, 1,000,000 and 2,000,000 reads for SEED hierarchical microbial functional ex-  
463 pressed genes (level 4), 10,000,000 reads with cutoffs at 50,000, 100,000, 200,000,  
464 500,000, 1,000,000, 2,000,000 and 5,000,000 reads, and 10,000,000 reads for RefSeq  
465 bacterial functional expressed genes, and 1,500,000 reads with cutoffs at 10,000, 20,000,  
466 50,000, 100,000, 200,000, 500,000 and 1,000,000 reads for RefSeq eukaryotic expressed  
467 genes.

468 **TABLE S1.** Variation in the expression of soil microbial genes between years (2017  
469 vs. 2016; A, C and E) and between months (September vs. June; B, D and F), based on  
470 SEED hierarchical microbial (level 4; A and B), RefSeq bacterial (C and D), and RefSeq  
471 eukaryotic (E and F) functional annotations (DESeq2, adjusted  $P < 0.05$ ).

#### 472 ACKNOWLEDGMENTS

473 We are grateful to Michel Fortin, Éléonore Tremblay, Pierre-Yves Véronneau, Dave Thi-  
474 bouthot Ste-Croix, David Berthiaume and other colleagues at AAFC for assistance in  
475 crop cultivation and sample collection and processing. We also thank Gaston Mercier  
476 (AAFC) for performing soil physicochemical analysis. Finally, we greatly thank Golrokh  
477 Kiani (CERMO-UQAM) and Joël Lafond-Lapalme (AAFC) for their suggestions in data  
478 processing, and Geneviève Labrie (CRAM) and Annie-Ève Gagnon (AAFC) for their valu-  
479 able scientific advice and suggestions.

#### 480 AUTHORS' CONTRIBUTIONS

481 MP, BM, and SK conceived and designed the study; BM and SK obtained the fund-  
482 ing; MP collected and analyzed data and wrote the manuscript; All authors critically  
483 reviewed and edited the manuscript.

#### 484 DECLARATION OF COMPETING INTEREST

485 The authors declare no conflict of interest for this paper.

#### 486 FUNDING

487 This research was funded by Agriculture and Agri-Food Canada (BM), the Natural Sci-  
488 ences and Engineering Research Council of Canada Discovery Grants program (SK)  
489 and the Canada Research Chair (SK). It was also enabled in part by support provided  
490 by Compute Canada and Calcul Quebec.

#### 491 REFERENCES



Parizadeh et al.

1. **Sharma SK, Ramesh A, Sharma MP, Joshi OP, Govaerts B, Steenwerth KL, Karlen DL.** 2010. Microbial Community Structure and Diversity as Indicators for Evaluating Soil Quality, p 317–358. *In* Lichtfouse E (ed), Biodiversity, Biofuels, Agroforestry and Conservation Agriculture. Springer Netherlands, Dordrecht.
2. **Doran JW, Safley M, Others.** 1997. Defining and assessing soil health and sustainable productivity. *Biol indicators soil health.* p 1–28.
3. **van Bruggen AHC, Semenov AM, van Diepeningen AD, de Vos OJ, Blok WJ.** 2006. Relation between soil health, wave-like fluctuations in microbial populations, and soil-borne plant disease management, p 105–122. *In* Savary S, Cooke BM (ed), Plant disease epidemiology: facing challenges of the 21st Century: Under the aegis of an International Plant Disease Epidemiology Workshop held at Landernau, France, 10–15th April, 2005. Springer Netherlands, Dordrecht.
4. **Itoh H, Navarro R, Takeshita K, Tago K, Hayatsu M, Hori T, Kikuchi Y.** Aug 2014. Bacterial population succession and adaptation affected by insecticide application and soil spraying history. *Front. Microbiol.* 5:457.
5. **Arora S, Sahni D.** 2016. Pesticides effect on soil microbial ecology and enzyme activity- An overview. . .
6. **Nannipieri P, Ascher J, Ceccherini MT, Landi L, Pietramellara G, Renella G.** 2003. Microbial diversity and soil functions. . .
7. **Hussain S, Siddique T, Saleem M, Arshad M, Khalid A.** Jan. 2009. Impact of Pesticides on Soil Microbial Diversity, Enzymes, and Biochemical Reactions - Chapter 5, p 159–200. *In* Advances in Agronomy, vol 102. Academic Press.
8. **Kagabu S.** 1996. Studies on the Synthesis and Insecticidal Activity of Neonicotinoid Compounds. *J. Pestic. Sci.* 21 (2):231–239.
9. **Tomizawa M, Casida JE.** 2005. Neonicotinoid insecticide toxicology: mechanisms of selective action. *Annu. Rev. Pharmacol. Toxicol.* 45:247–268.
10. **Goulson D.** 2013. REVIEW: An overview of the environmental risks posed by neonicotinoid insecticides. . .
11. **Samson-Robert O, Labrie G, Chagnon M, Fournier V.** Aug 2017. Planting of neonicotinoid-coated corn raises honey bee mortality and sets back colony development. *PeerJ* 5:e3670.
12. **Labrie G, Gagnon AÈ, Vanasse A, Latraverse A, Tremblay G.** Feb 2020. Impacts of neonicotinoid seed treatments on soil-dwelling pest populations and agronomic parameters in corn and soybean in Quebec (Canada). *PLoS One* 15 (2):e0229136.
13. **Iwasa T, Motoyama N, Ambrose JT, Roe RM.** May 2004. Mechanism for the differential toxicity of neonicotinoid insecticides in the honey bee, *Apis mellifera*. *Crop Prot.* 23 (5):371–378.
14. **Samson-Robert O, Labrie G, Chagnon M, Fournier V.** Dec 2014. Neonicotinoid-contaminated puddles of water represent a risk of intoxication for honey bees. *PLoS One* 9 (12):e108443.
15. **Bonmatin JM, Giorio C, Girolami V, Goulson D, Kreutzweiser DP, Krupke C, Liess M, Long E, Marzaro M, Mitchell EAD, Noome DA, Simon-Delso N, Tapparo A.** Jan 2015. Environmental fate and exposure; neonicotinoids and fipronil. *Environ. Sci. Pollut. Res. Int.* 22 (1):35–67.
16. **Pisa LW, Amaral-Rogers V, Belzunces LP, Bonmatin JM, Downs CA, Goulson D, Kreutzweiser DP, Krupke C, Liess M, McField M, Morrissey CA, Noome DA, Settele J, Simon-Delso N, Stark JD, Van der Sluijs JP, Van Dyck H, Wiemers M.** Jan 2015. Effects of neonicotinoids and fipronil on non-target invertebrates. *Environ. Sci. Pollut. Res. Int.* 22 (1):68–102.
17. **Qi S, Wang D, Zhu L, Teng M, Wang C, Xue X, Wu L.** May 2018. Effects of a novel neonicotinoid insecticide cycloxaprid on earthworm, *Eisenia fetida*. *Environ. Sci. Pollut. Res. Int.* 25 (14):14138–14147.
18. **Whitehorn PR, Norville G, Gilburn A, Goulson D.** 2018. Larval exposure to the neonicotinoid imidacloprid impacts adult size in the farmland butterfly *Pieris brassicae*. . .
19. **Cycoń M, Markowicz A, Borymski S, Wójcik M, Piotrowska-Seget Z.** Dec 2013. Imidacloprid induces changes in the structure, genetic diversity and catabolic activity of soil microbial communities. *J. Environ. Manag* 131:55–65.
20. **Hopewell H, Floyd KG, Burnell D, Hancock JT, Allainguillaume J, Ladomery MR, Wilson ID.** Sep 2017. Residual ground-water levels of the neonicotinoid thiacloprid perturb chemosensing of *Caenorhabditis elegans*. *Ecotoxicology* 26 (7):981–990.
21. **Li Y, An J, Dang Z, Lv H, Pan W, Gao Z.** Dec 2018. Treating wheat seeds with neonicotinoid insecticides does not harm the rhizosphere microbial community. *PLoS One* 13 (12):e0205200.
22. **Zhang P, Ren C, Sun H, Min L.** Feb 2018. Sorption, desorption and degradation of neonicotinoids in four agricultural soils and their effects on soil microorganisms. *Sci. Total Environ.* 615:59–69.
23. **Bradford BR, Whidden E, Gervasio ED, Checchi PM, Raley-Susman KM.** Sep 2020. Neonicotinoid-containing insecticide disruption of growth, locomotion, and fertility in *Caenorhabditis elegans*. *PLoS One* 15 (9):e0238637.
24. **Yu B, Chen Z, Lu X, Huang Y, Zhou Y, Zhang Q, Wang D, Li J.** Mar 2020. Effects on soil microbial community after exposure to neonicotinoid insecticides thiamethoxam and dinotefuran. *Sci. Total Environ.* 725:138328.
25. **Parizadeh M, Mimee B, Kembel SW.** 2021. Neonicotinoid Seed Treatments Have Significant Non-target Effects on Phyllosphere and Soil Bacterial Communities. *Front. Microbiol.* 11:3445.
26. **Wu C, Wang Z, Ma Y, Luo J, Gao X, Ning J, Mei X, She D.** Mar 2021. Influence of the neonicotinoid insecticide thiamethoxam on soil bacterial community composition and metabolic function. *J. Hazard. Mater.* 405:124275.
27. **Yu Z, Schmidt O, Zhao Y, Liu M, Kumar A, Luo Y, Xu J.** Sep 2021. Dinotefuran alters *Collembola*-fungi-bacteria interactions that control mineralization of maize and soil organic carbon. *J. Hazard. Mater.* 418:126391.
28. **Bass C, Carvalho RA, Oliphant L, Puinean AM, Field LM, Nauen R, Williamson MS, Moores G, Gorman K.** Dec 2011. Overexpression of a cytochrome P450 monooxygenase, CYP6ER1, is associated with resistance to imidacloprid in the brown planthopper, *Nilaparvata lugens*. *Insect Mol. Biol.* 20 (6):763–773.
29. **Xie W, Meng QS, Wu QJ, Wang SL, Yang X, Yang NN, Li RM, Jiao XG, Pan HP, Liu BM, Su Q, Xu BY, Hu SN, Zhou XG, Zhang YJ.** 2012. Pyrosequencing the *Bemisia tabaci* Transcriptome Reveals a Highly Diverse Bacterial Community and a Robust System for Insecticide Resistance. . .
30. **Chen C, Shan T, Liu Y, Shi X, Gao X.** Apr 2019. Identification of a novel cytochrome P450 CYP3356A1 linked with insecticide detoxification in *Bradysia odoriphaga*. *Pest Manag Sci.* 75 (4):1006–1013.
31. **Cycoń M, Piotrowska-Seget Z.** Jan 2015. Biochemical and microbial soil functioning after application of the insecticide imidacloprid. *J. Environ. Sci.* 27:147–158.
32. **Elbert A, Haas M, Springer B, Thielert W, Nauen R.** Nov 2008. Applied aspects of neonicotinoid uses in crop protection. *Pest Manag Sci.* 64 (11):1099–1105.
33. **Cataneo AC, Ferreira LC, Carvalho JC, Andréo-Souza Y, Corniani N, Mischan MM, Nunes JC.** Apr 2010. Improved germination of soybean seed treated with thiamethoxam under drought conditions. *Seed Sci. Technol.* 38 (1):248–251.
34. **Larsen RJ, Falk DE.** May 2013. Effects of a seed treatment with a neonicotinoid insecticide on germination and freezing tolerance of spring wheat seedlings. *Can. J. Plant Sci.* 93 (3):535–540.



Neonicotinoids Affect Soil Microbial Gene Expression

35. **Wulff JA, Kiani M, Regan K, Eubanks MD, Szczepaniec A.** Feb 2019. Neonicotinoid Insecticides Alter the Transcriptome of Soybean and Decrease Plant Resistance. *Int. J. Mol. Sci.* 20 (3).
36. **Magalhaes LC, Hunt TE, Siegfried BD.** Feb 2009. Efficacy of neonicotinoid seed treatments to reduce soybean aphid populations under field and controlled conditions in Nebraska. *J. Econ. Entomol.* 102 (1):187–195.
37. **Seagraves MP, Lundgren JG.** Mar 2012. Effects of neonicotinoid seed treatments on soybean aphid and its natural enemies. *J. Pest Sci.* 85 (1):125–132.
38. **Cycon M, Kaczynska A, Piotrowska-Seget Z.** 2005. Soil enzyme activities as indicator of soil pollution by pesticides. *PESTYCYDY-WARSZAWA*- 1:35.
39. **Singh J, Singh DK.** 2005. Bacterial, azotobacter, actinomycetes, and fungal population in soil after diazinon, imidacloprid, and lindane treatments in groundnut (*Arachis hypogaea* L.) fields. *J. Environ. Sci. Health B* 40 (5):785–800.
40. **Filimon MN, Voia SO, Popescu R, Dumitrescu G, Ciocina LP, Mituletu M, Vlad DC.** 2015. The effect of some insecticides on soil microorganisms based on enzymatic and bacteriological analyses. *Rom. Biotechnol. Lett.* 20 (3):10439–10447.
41. **Bailly J, Fraissinet-Tachet L, Verner MC, Debaud JC, Lemaire M, Wésolowski-Louvel M, Marmeisse R.** Nov 2007. Soil eukaryotic functional diversity, a metatranscriptomic approach. *ISME J.* 1 (7):632–642.
42. **Brotto AC, Annavajhala MK, Chandran K.** 2018. Metatranscriptomic Investigation of Adaptation in NO and N<sub>2</sub>O Production From a Lab-Scale Nitrification Process Upon Repeated Exposure to Anoxic-Aerobic Cycling. . .
43. **Ma L, Wang H, Wu J, Wang Y, Zhang D, Liu X.** May 2019. Metatranscriptomics reveals microbial adaptation and resistance to extreme environment coupling with bioleaching performance. *Bioreour. Technol.* 280:9–17.
44. **Hannula SE, Kielak AM, Steinauer K, Huberty M, Jongen R, De Long JR, Heinen R, Bezemer TM.** Dec 2019. Time after Time: Temporal Variation in the Effects of Grass and Forb Species on Soil Bacterial and Fungal Communities. *MBio* 10 (6).
45. **Mentzer JL, Goodman RM, Balsler TC.** Jun 2006. Microbial response over time to hydrologic and fertilization treatments in a simulated wet prairie. *Plant Soil* 284 (1-2):85–100.
46. **Wu M, Liu J, Li W, Liu M, Jiang C, Li Z.** Oct 2017. Temporal dynamics of the compositions and activities of soil microbial communities post-application of the insecticide chlorantranilprole in paddy soils. *Ecotoxicol. Environ. Saf.* 144:409–415.
47. **Walker BH.** Mar 1992. Biodiversity and ecological redundancy. *Conserv Biol.* 6 (1):18–23.
48. **Fetzer I, Johst K, Schäwe R, Banitz T, Harms H, Chatzinotas A.** 2015. The extent of functional redundancy changes as species' roles shift in different environments. . .
49. **Burke C, Steinberg P, Rusch D, Kjelleberg S, Thomas T.** Aug 2011. Bacterial community assembly based on functional genes rather than species. *Proc. Natl. Acad. Sci. U. S. A.* 108 (34):14288–14293.
50. **Gosalbes MJ, Durbán A, Pignatelli M, Abellan JJ, Jiménez-Hernández N, Pérez-Cobas AE, Latorre A, Moya A.** Mar 2011. Metatranscriptomic approach to analyze the functional human gut microbiota. *PLoS One* 6 (3):e17447.
51. **Steffen MM, Li Z, Effler TC, Hauser LJ, Boyer GL, Wilhelm SW.** Aug 2012. Comparative metagenomics of toxic freshwater cyanobacteria bloom communities on two continents. *PLoS One* 7 (8):e44002.
52. **Franzosa EA, Morgan XC, Segata N, Waldron L, Reyes J, Earl AM, Giannoukos G, Boylan MR, Ciulla D, Gevers D, Izard J, Garrett WS, Chan AT, Huttenhower C.** Jun 2014. Relating the metatranscriptome and metagenome of the human gut. *Proc. Natl. Acad. Sci. U. S. A.* 111 (22):E2329–38.
53. **Grządziel J.** 2017. Functional redundancy of soil microbiota—does more always mean better? *Pol. J. Soil Sci.* .
54. **Lajoie G, Maglione R, Kembel SW.** May 2020. Adaptive matching between phyllosphere bacteria and their tree hosts in a neotropical forest. *Microbiome* 8 (1):70.
55. **Zamorano L, Moyà B, Juan C, Mulet X, Blázquez J, Oliver A.** Sep 2014. The *Pseudomonas aeruginosa* CreBC two-component system plays a major role in the response to  $\beta$ -lactams, fitness, biofilm growth, and global regulation. *Antimicrob. Agents Chemother.* 58 (9):5084–5095.
56. **Huang HH, Lin YT, Chen WC, Huang YW, Chen SJ, Yang TC.** Dec 2015. Expression and Functions of CreD, an Inner Membrane Protein in *Stenotrophomonas maltophilia*. *PLoS One* 10 (12):e0145009.
57. **Pitombo LM, do Carmo JB, de Hollander M, Rossetto R, López MV, Cantarella H, Kuramae EE.** Sep 2016. Exploring soil microbial 16S rRNA sequence data to increase carbon yield and nitrogen efficiency of a bioenergy crop. *GCB Bioenergy* 8 (5):867–879.
58. **Singh J, Singh DK.** 2006. Ammonium, Nitrate and Nitrite Nitrogen and Nitrate Reductase Enzyme Activity in Groundnut (*Arachis hypogaea* L.) Fields After Diazinon, Imidacloprid and Lindane Treatments. . .
59. **Swift MJ, Bignell DE, Moreira FMds, Huising EJ.** 2008. The inventory of soil biological diversity: concepts and general guidelines. *A Handb Trop Soil Biol* Moreira, FMS, Huising, EJ, Bignell, DE, Eds .
60. **Staley C, Gould TJ, Wang P, Phillips J, Cotner JB, Sadowsky MJ.** Aug 2014. Core functional traits of bacterial communities in the Upper Mississippi River show limited variation in response to land cover. *Front. Microbiol.* 5:414.
61. **Westreich ST, Treiber ML, Mills DA, Korf I, Lemay DG.** May 2018. SAMSA2: a standalone metatranscriptome analysis pipeline. *BMC Bioinform* 19 (1):175.
62. **Zhang J, Kobert K, Flouri T, Stamatakis A.** Mar 2014. PEAR: a fast and accurate Illumina Paired-End reAd mergeR. *Bioinformatics* 30 (5):614–620.
63. **Bolger AM, Lohse M, Usadel B.** Aug 2014. Trimmomatic: a flexible trimmer for Illumina sequence data. *Bioinformatics* 30 (15):2114–2120.
64. **Kopylova E, Noé L, Touzet H.** Dec 2012. SortMeRNA: fast and accurate filtering of ribosomal RNAs in metatranscriptomic data. *Bioinformatics* 28 (24):3211–3217.
65. **Buchfink B, Xie C, Huson DH.** Jan 2015. Fast and sensitive protein alignment using DIAMOND. *Nat. Methods* 12 (1):59–60.
66. **Buchfink B, Reuter K, Drost HG.** Apr 2021. Sensitive protein alignments at tree-of-life scale using DIAMOND. *Nat. Methods* 18 (4):366–368.
67. **Overbeek R, Olson R, Pusch GD, Olsen GJ, Davis JJ, Disz T, Edwards RA, Gerdes S, Parrello B, Shukla M, Vonstein V, Wattam AR, Xia F, Stevens R.** Jan 2014. The SEED and the Rapid Annotation of microbial genomes using Subsystems Technology (RAST). *Nucleic Acids Res.* 42 (Database issue):D206–14.
68. **Tatusova T, Ciufu S, Fedorov B, O'Neill K, Tolstoy I.** 2014. RefSeq microbial genomes database: new representation and annotation strategy. . .
69. **Bray JR, Curtis JT.** Feb 1957. An Ordination of the Upland Forest Communities of Southern Wisconsin. *Ecol. Monogr.* 27 (4):325–349.
70. **Anderson MJ.** 2001. A new method for non-parametric multivariate analysis of variance. *Austral Ecol.* 26 (1):32–46.
71. **Oksanen J, Blanchet FG, Friendly M, Kindt R, Legendre P, McGlinn D, Minchin PR, O'Hara RB, Simpson GL, Solymos P, Stevens MHH,**

Parizadeh et al.

- Szoecs E, Wagner H.** 2020. vegan: Community Ecology Package. <https://CRAN.R-project.org/package=vegan>. R package version 2.5-7.
72. **R Core Team.** 2019. R: A language and environment for statistical computing. R Found for Stat Comput Vienna, Austria. .
73. **Wilcoxon F.** 1945. Individual Comparisons by Ranking Methods. . .
74. **Love MI, Huber W, Anders S.** 2014. Moderated estimation of fold change and dispersion for RNA-seq data with DESeq2. Genome Biol. 15 (12):550.
75. **Hochberg Y, Benjamini Y.** Jul 1990. More powerful procedures for multiple significance testing. Stat. Med. 9 (7):811–818.

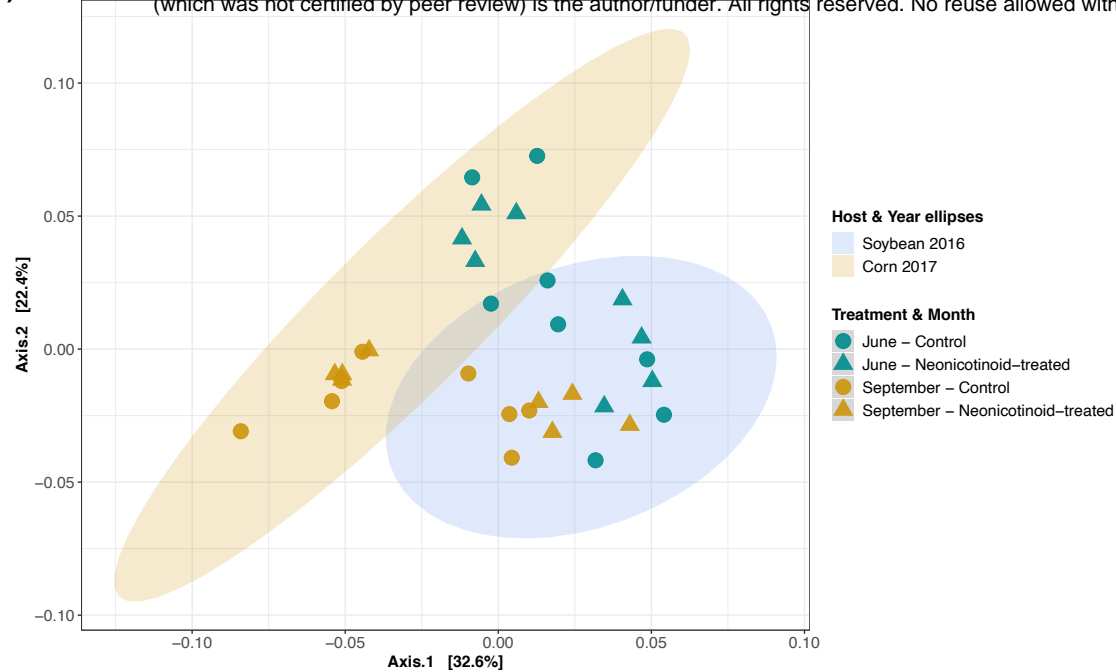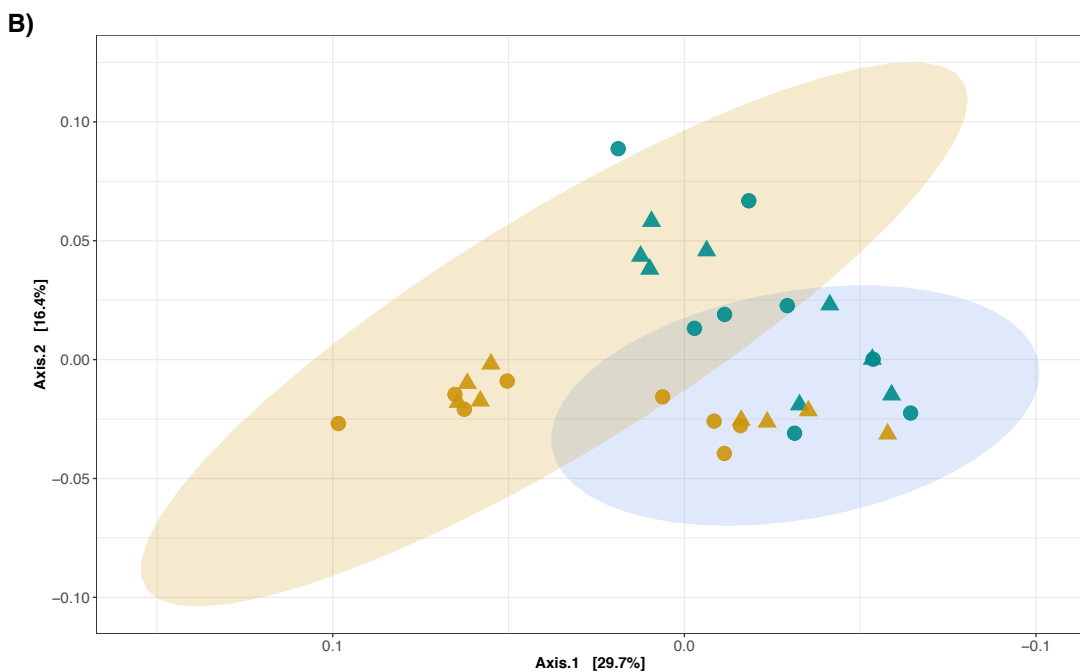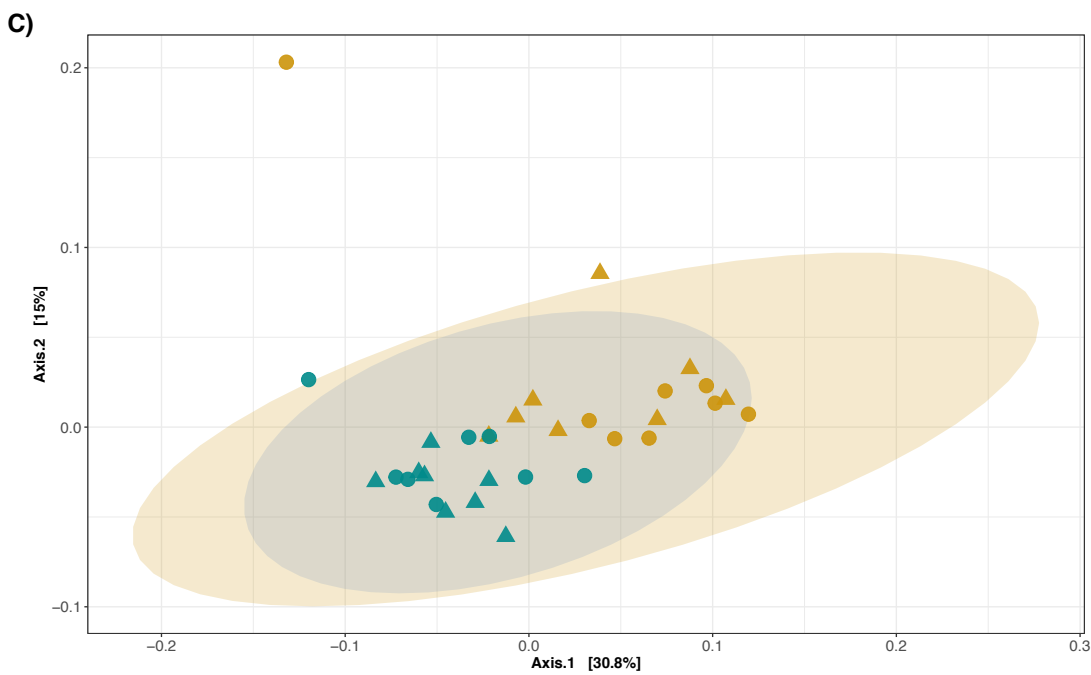

Source: http://biorxiv.org/content/10.1101/2022.01.20.477174v1.full.pdf
